# Supplementary material for: Comparative changes in treatment practices and clinical outcomes following implementation of a prospective payment system: the STEPPS study
Source: PubMed Central journal article supplement (PMC4428114; doi:10.1186/s12882-015-0059-8), 2015-05-01

Supplementary Figure 1a-d

a)

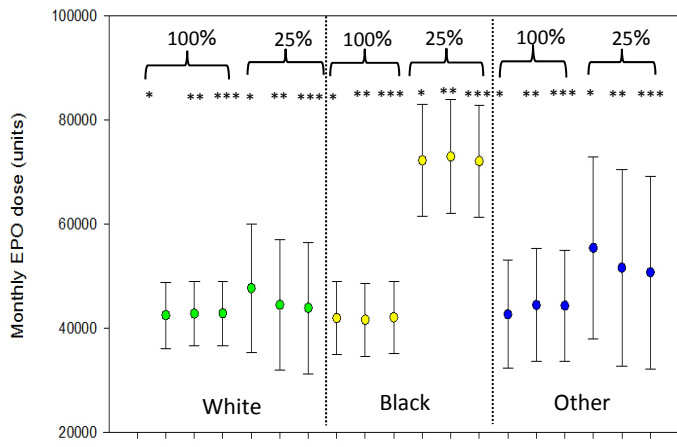

b)

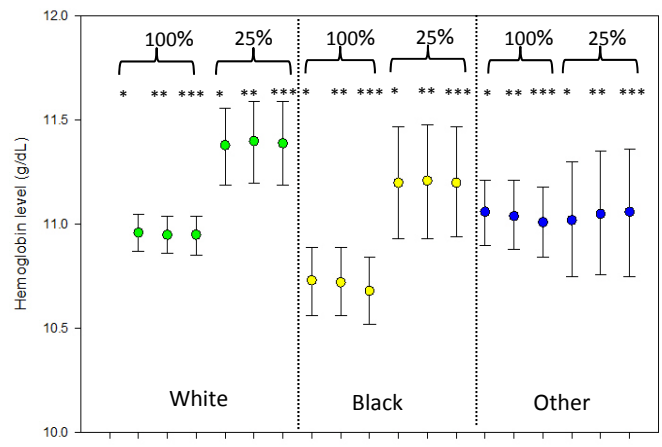

c) Patients with mean hemoglobin <10g/dL

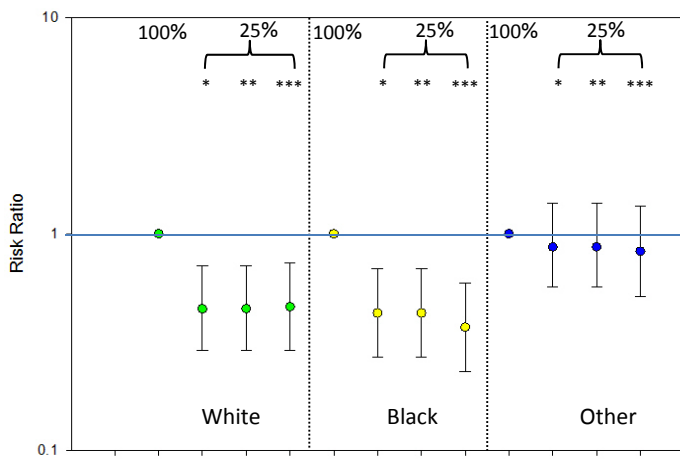

d) Patients with mean hemoglobin ≥12g/dL

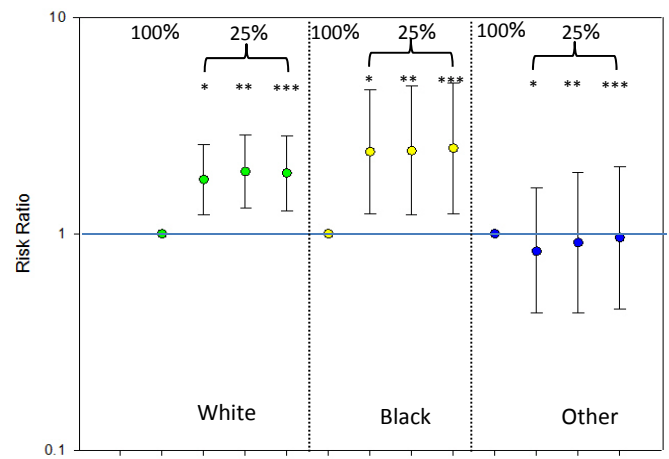

Supplement: 12882_2015_59_MOESM1_ESM.pdf [file 12882_2015_59_MOESM1_ESM.pdf]
